# Supplementary material for: Accounting for super-, plateau- and mesa-rate burning by lead and copper-based ballistic modifiers in double-base propellants: a computational study
Source: Royal Society of Chemistry journal article supplement (doi:10.1039/d3cp03197g), 2023-01-01
Supplement: d3cp03197g1.pdf [file d3cp03197g1.pdf]

## Accounting for super-, plateau- and mesa-rate burning by lead and copper-based ballistic modifiers in double base propellants: a computational study

Lisette R. Warren,<sup>a</sup> Aaron Rowell,<sup>a</sup> Patrick McMaster,<sup>b</sup> Colin R. Pulham,<sup>a</sup> and Carole A. Morrison<sup>a,\*</sup>

<sup>a</sup> EaSTCHEM School of Chemistry, University of Edinburgh, The King's Buildings, David Brewster Road, Edinburgh, EH9 3FJ, UK.

<sup>b</sup> DOSG-ST1, NH4, MoD Abbey Wood, Bristol, BS34 8JH

### Supplementary Information

**S1:** Energy rankings and global minimum structures obtained for  $\text{Pb}_x\text{O}_y$ , ( $x \leq 6, y \leq x + 3$ ) clusters from AIRSS/DFT study

**S2:** Chemical stabilities of  $\text{Pb}_x\text{O}_y$ , ( $x \leq 6, y \leq x + 3$ ) clusters

**S3:** Energy rankings for sequential carbon attachment to  $\text{Pb}_4\text{O}_{4-6}$

**S4:** Radial distribution functions for Pb...Pb distances from carbon binding study to  $\text{Pb}_4\text{O}_{4-6}$

**S5:** Fitting functions for lines of best fit for the local force constants vs bond length plots

**S6:** Energy rankings for sequential carbon attachment to  $\text{Cu}_5\text{O}_5$

**S7:** Radial distribution functions for Cu...Cu distances from carbon binding study to  $\text{Cu}_5\text{O}_5$

**S8:** Small molecule binding study to metal oxide clusters:  $\text{NO}_2$  and  $\text{CH}_2\text{O}$  bond weakening effects

**S9:** Individual binding modes for  $\text{NO}_2$  and  $\text{CH}_2\text{O}$  to  $\text{Pb}_4\text{O}_{4-6}\text{C}_{0-12}$  and  $\text{Cu}_5\text{O}_5\text{C}_{0-12}$  clusters

**S10:** Exploring the effects of varying electronic spin states for cluster series  $\text{Pb}_4\text{O}_{4-6}\text{C}_{3,12}$  and  $\text{Cu}_5\text{O}_5\text{C}_{3,12}$

**S1: Energy rankings and global minimum structures obtained for  $Pb_xO_y$ , ( $x \leq 6, y \leq x + 3$ ) clusters from AIRSS/DFT study**

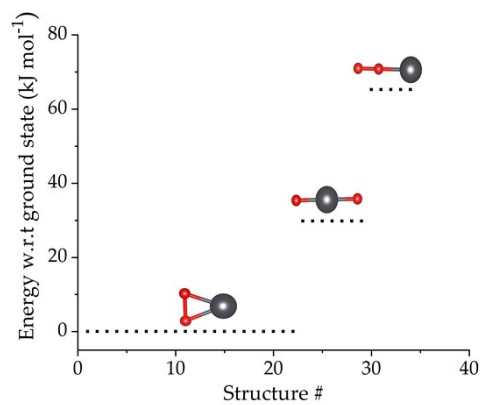

$PbO_2$

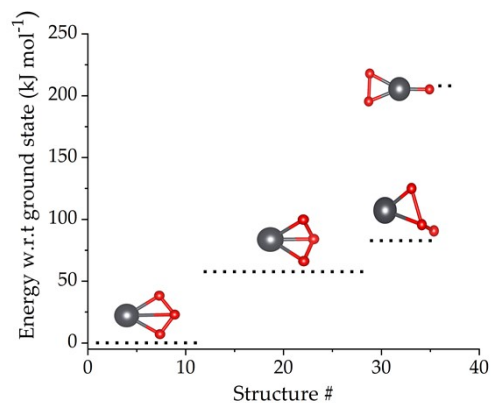

$PbO_3$

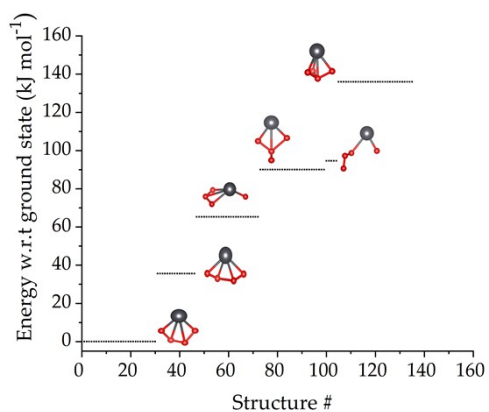

$PbO_4$

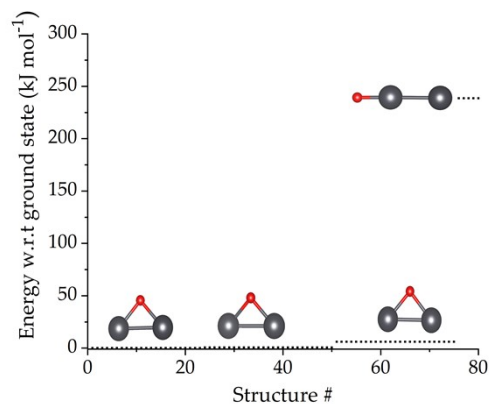

$Pb_2O$

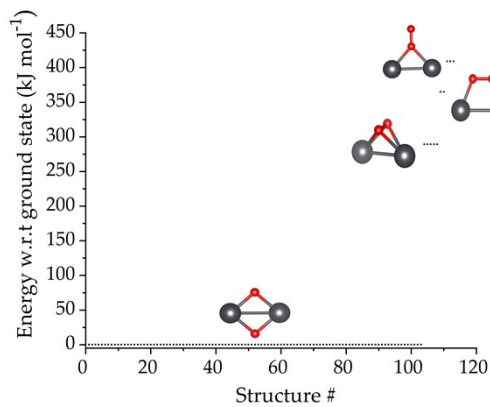

$Pb_2O_2$

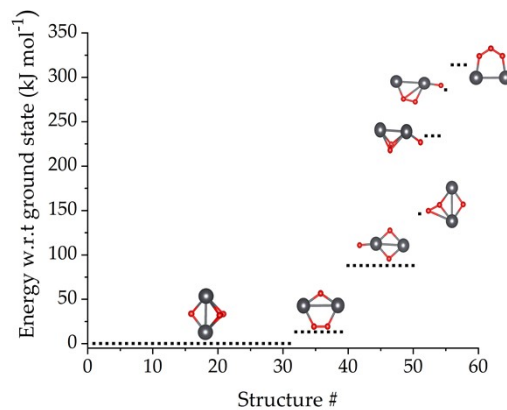

$Pb_2O_3$

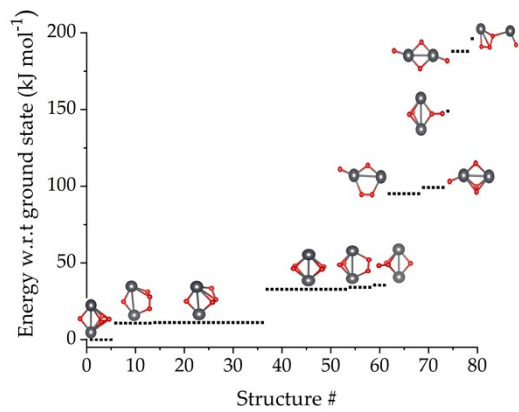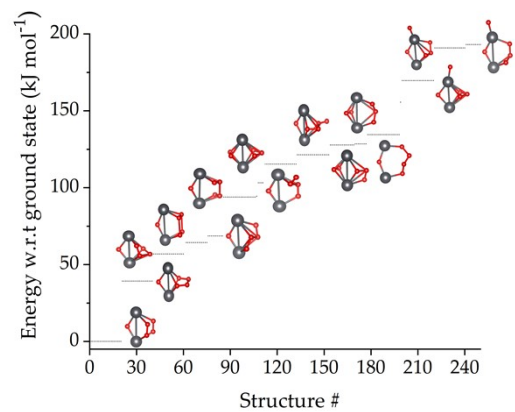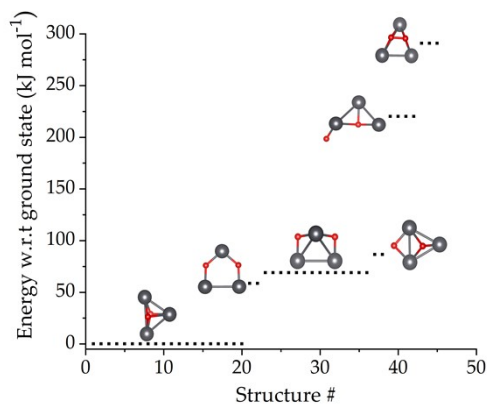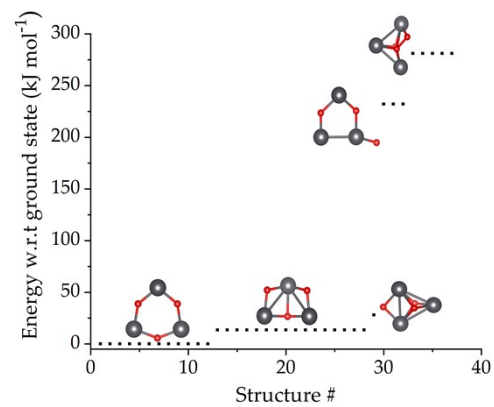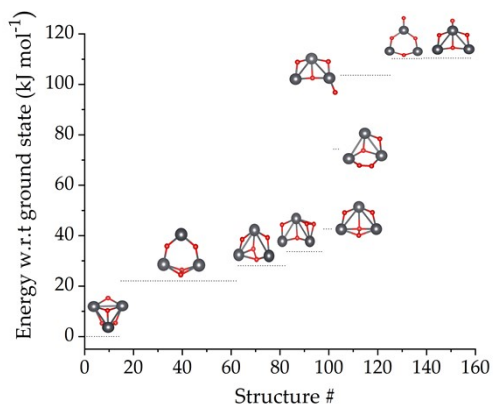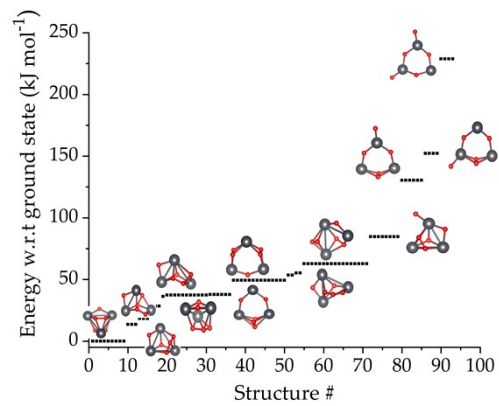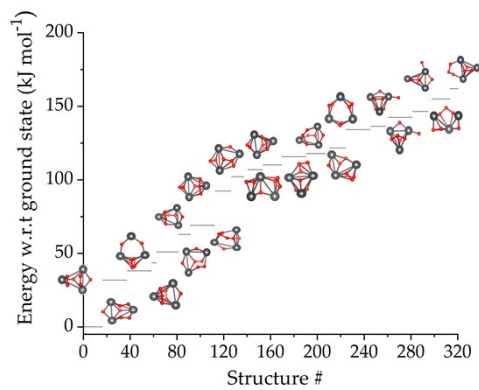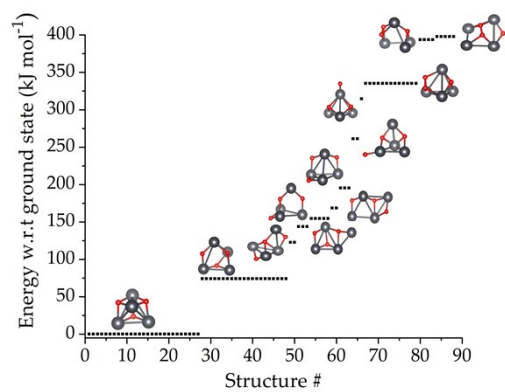

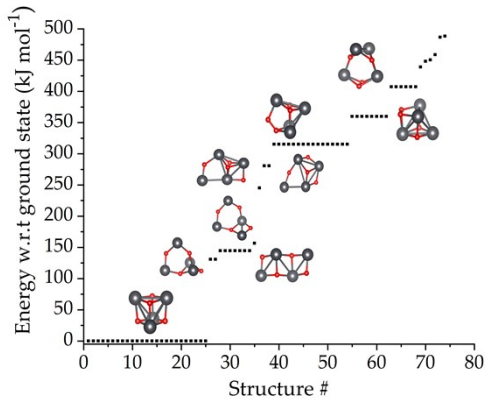

$\text{Pb}_4\text{O}_4$

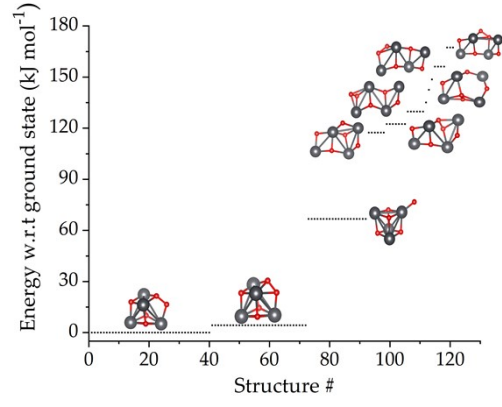

$\text{Pb}_4\text{O}_5$

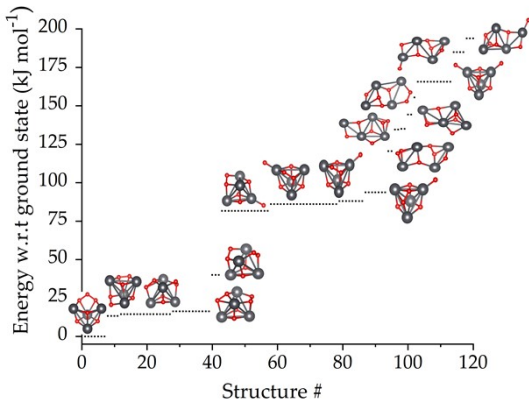

$\text{Pb}_4\text{O}_6$

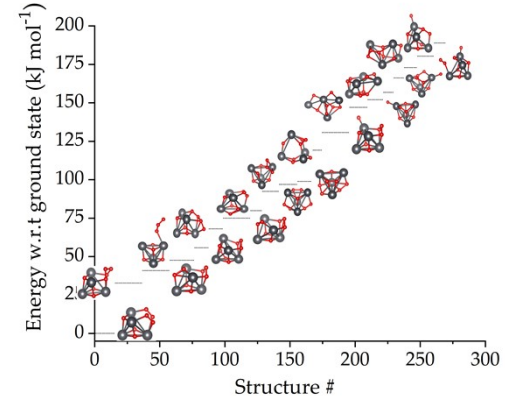

$\text{Pb}_4\text{O}_7$

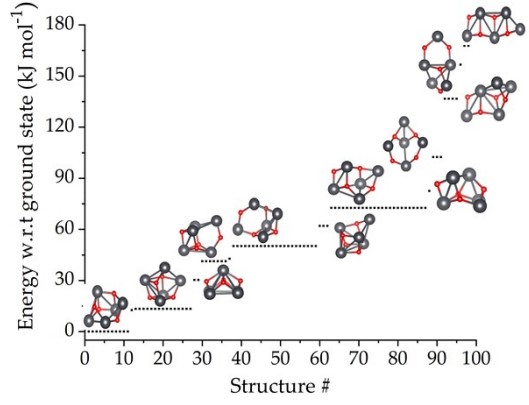

$\text{Pb}_5\text{O}_4$

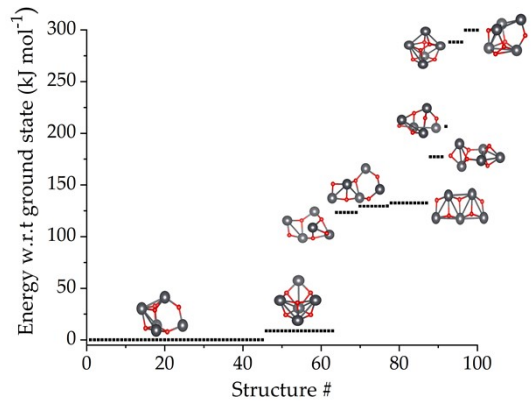

$\text{Pb}_5\text{O}_5$

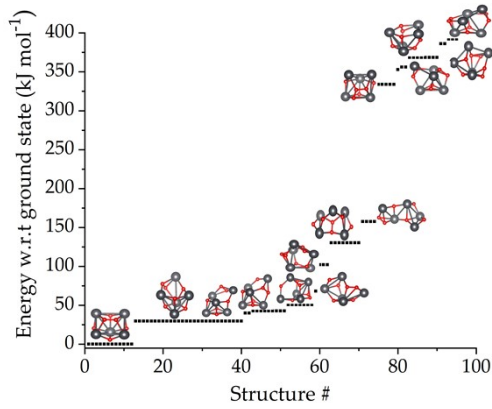

$\text{Pb}_5\text{O}_6$

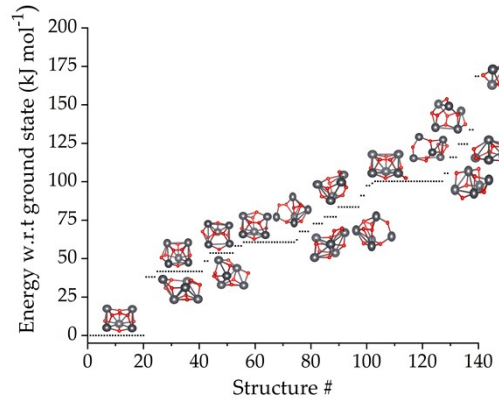

$\text{Pb}_5\text{O}_7$

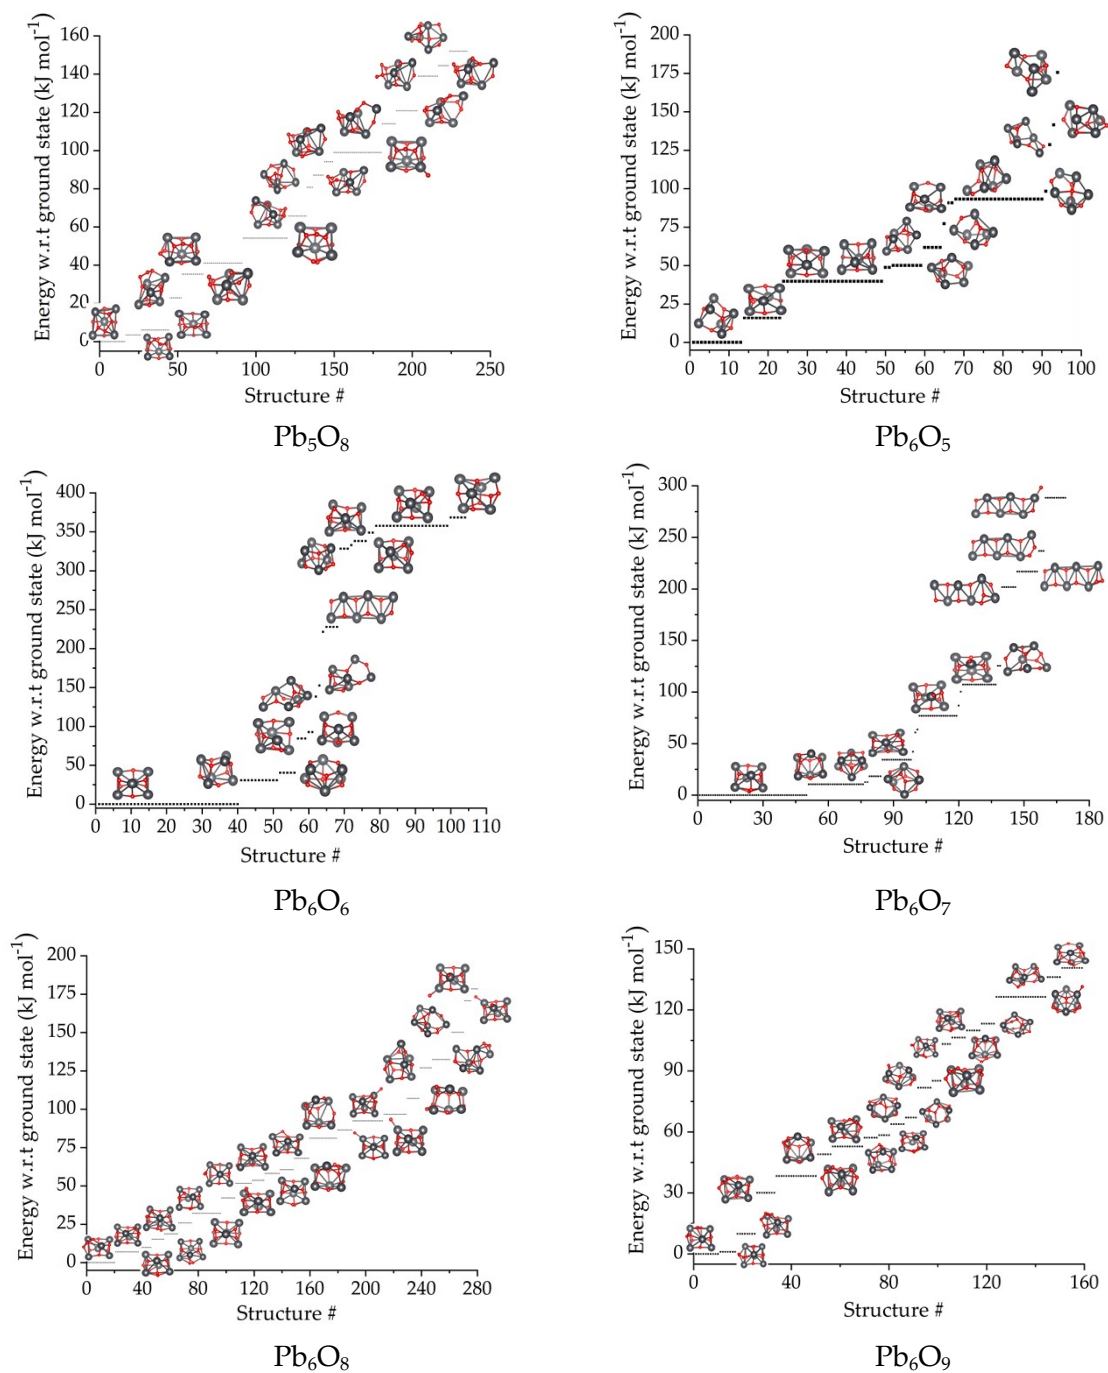

**Figure S1** Possible structures of small clusters of  $\text{Pb}_x\text{O}_y$  and their respective multiplicities generated by *ab initio* random structure searching.

The lowest energy structures thus obtained are summarised in Figure S2. The main structural features observed for the lead oxide clusters are that  $\text{Pb}_x\text{O}_y$  ( $x = y$ ) appears to result in highly symmetric clusters, in agreement with experimental data.<sup>1-4</sup> The geometries for the O-rich ( $x < y$ ) and Pb-rich ( $x > y$ ) can be viewed as small variants of their nearest  $(\text{PbO})_x$  global minimum structure. Many of the clusters are based on oxygen or lead insertion into a  $\text{Pb}_2\text{O}_2$  ring or  $\text{Pb}_4\text{O}_4$  cube. In low-oxygen environments, oxygen atoms generally form  $\mu_2$ -bridging sites (when  $x \leq 3$ ) or  $\mu_3$ -bridging sites (when  $x \geq 4$ ) until high symmetry structures are generated for equal Pb/O ratios. The oxygen-rich clusters all feature oxygen atoms binding together.

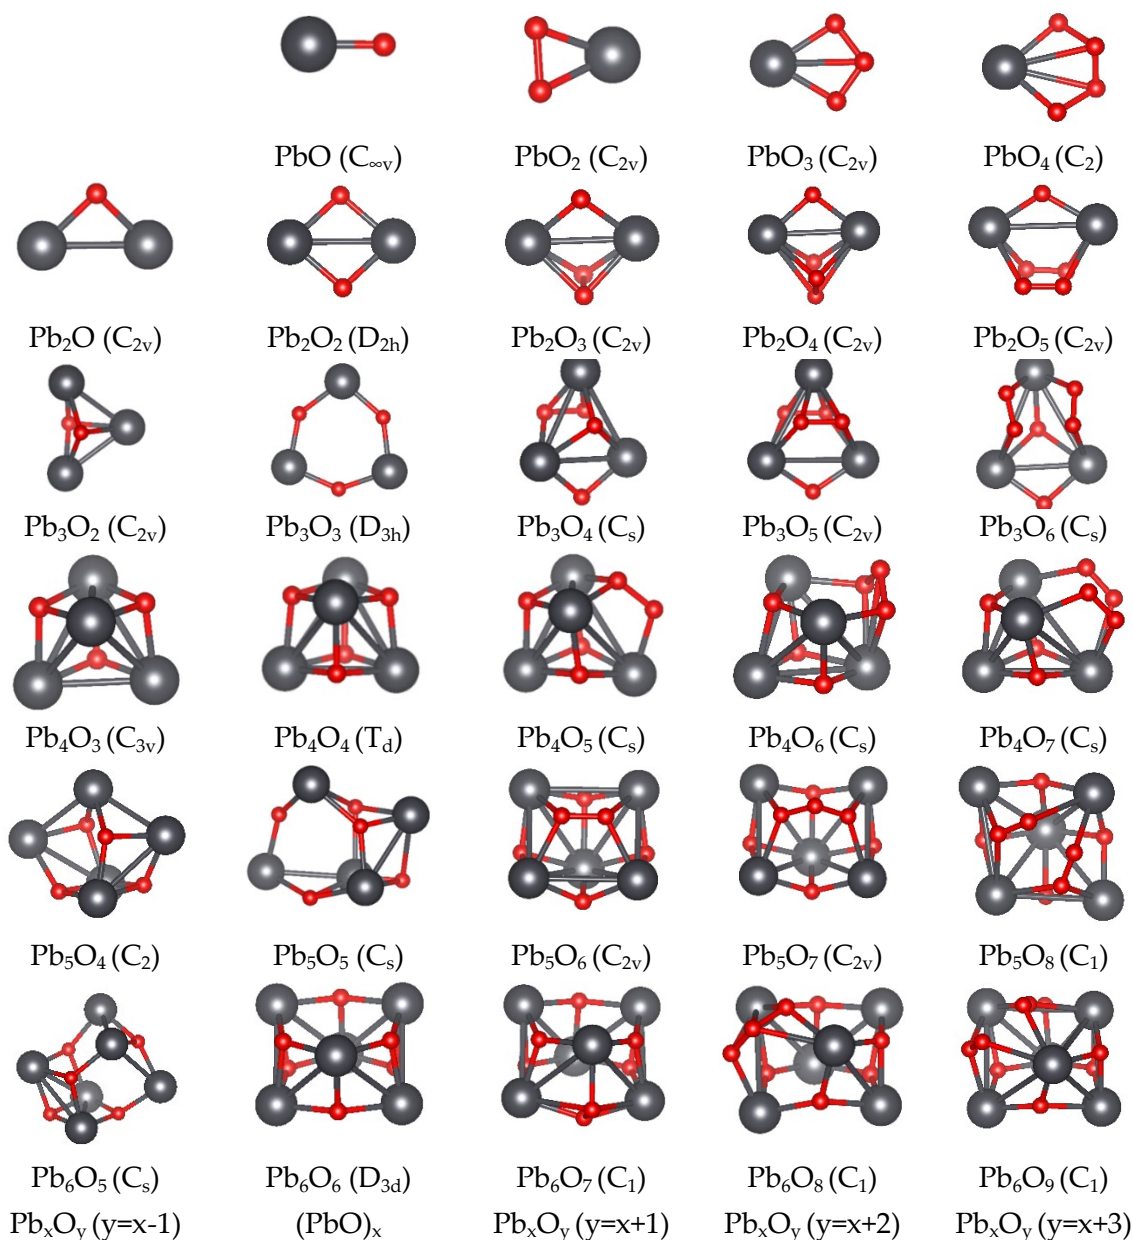

**Figure S2.** Global minimum energy structures of  $\text{Pb}_x\text{O}_y$  series found by AIRSS. Legend: dark grey (Pb) and red (O). Point group symmetry shown in brackets.



## S2: Chemical stabilities of $\text{Pb}_x\text{O}_y$ , ( $x \leq 6, y \leq x + 3$ ) clusters

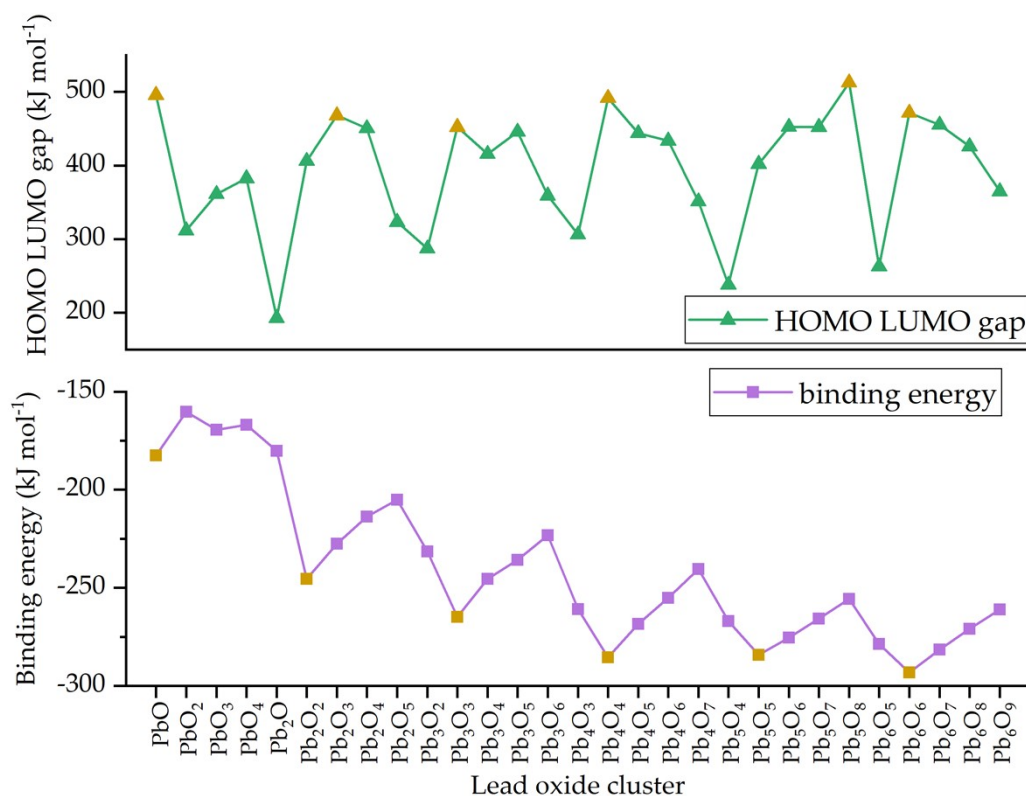

**Figure S3.** HOMO LUMO gaps (top) and average binding energies of  $\text{Pb}_x\text{O}_y$  clusters (bottom). Gold data points denote most negative binding energy and largest HOMO-LUMO gap for each  $\text{Pb}_x$  series. Binding energies and HOMO-LUMO gaps computed with the SDD/def2TZV basis set and PBE0-D3BJ level of theory using Gaussian16.

### S3: Energy rankings for sequential carbon attachment to $\text{Pb}_4\text{O}_{4-6}$

Energy rankings for sequential carbon additions (3-12 atoms) to  $\text{Pb}_4\text{O}_{4-6}$ , shown up to 200  $\text{kJ mol}^{-1}$  above the lowest energy structure for  $\text{C}_3$  to  $\text{C}_9$  and 250  $\text{kJ mol}^{-1}$  for  $\text{C}_{12}$ .

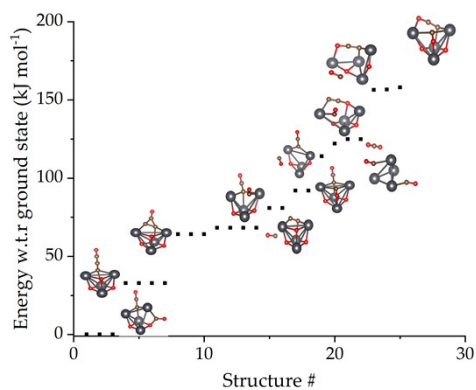

$\text{Pb}_4\text{O}_4\text{C}_3$

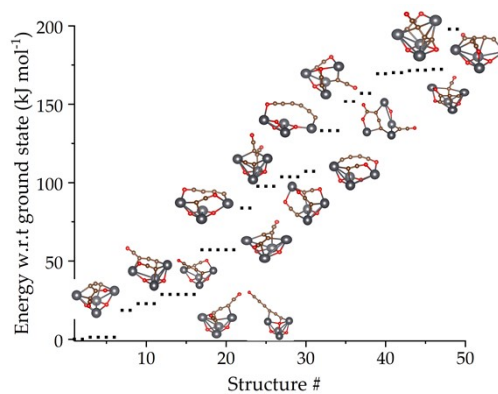

$\text{Pb}_4\text{O}_4\text{C}_6$

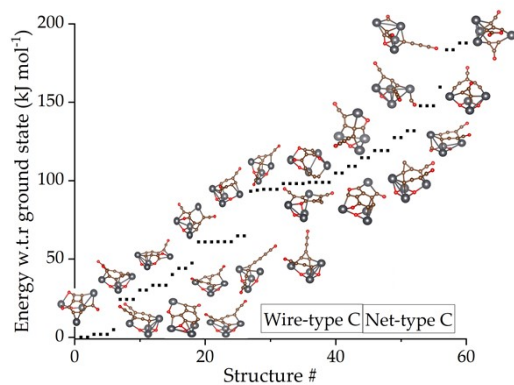

$\text{Pb}_4\text{O}_4\text{C}_9$

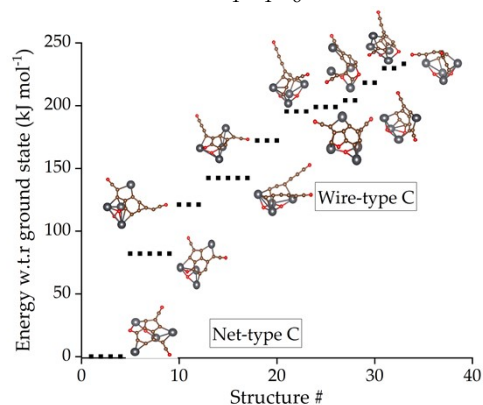

$\text{Pb}_4\text{O}_4\text{C}_{12}$

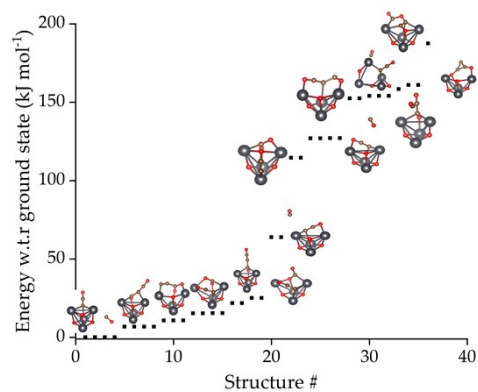

$\text{Pb}_4\text{O}_5\text{C}_3$

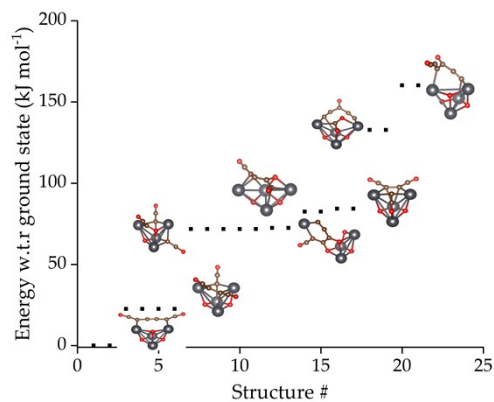

$\text{Pb}_4\text{O}_5\text{C}_6$



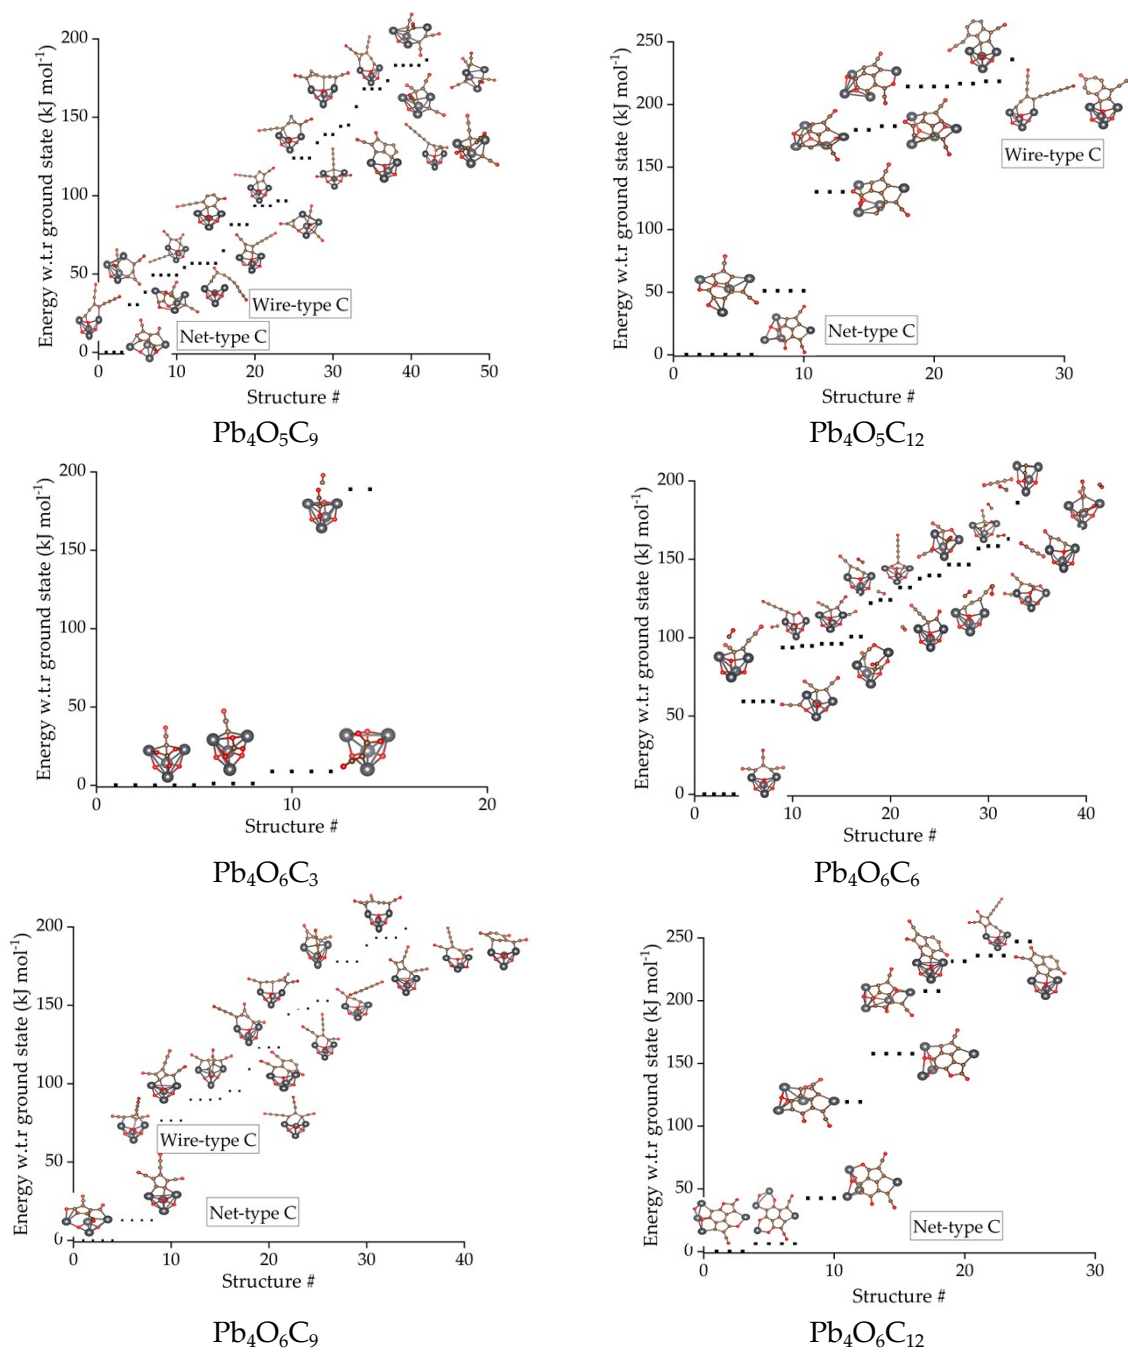

**Figure S4** Possible structures for carbon addition to Pb<sub>4</sub>O<sub>4-6</sub> generated by *ab initio* random structure searching.

**S4: Radial distribution functions for Pb...Pb distances from carbon binding study to Pb<sub>4</sub>O<sub>4-6</sub>**

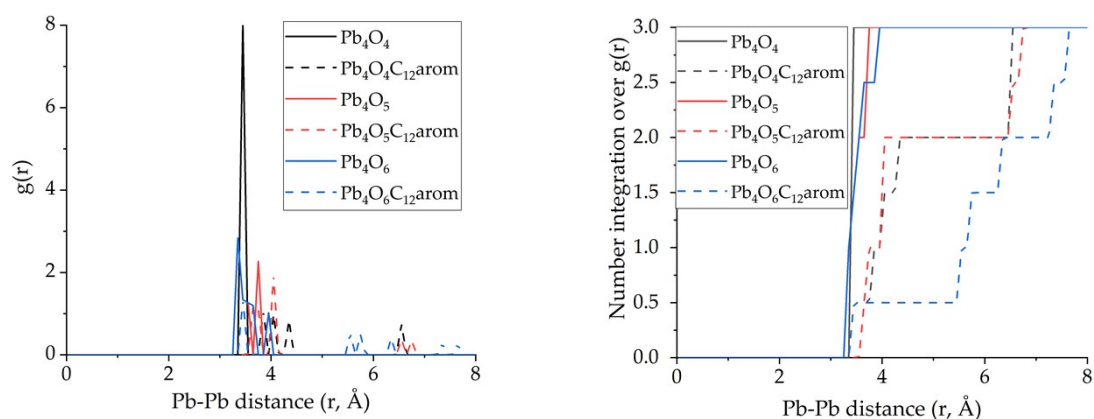

**Figure S5.** Radial distribution function  $g(r)$  (left) and integration over  $g(r)$  (right) for Pb-Pb distances within Pb<sub>4</sub>O<sub>4-6</sub>, and aromatic-C bound clusters.

**S5: Fitting functions for lines of best fit for the local force constants vs bond length plots**

**Table S1.** Fitting functions for line of best fits for M<sub>x</sub>O<sub>y</sub>C<sub>12</sub> for lead and copper oxide clusters.

| Chemical bond                          | Figure | Line of best fit                                       | R <sup>2</sup> |
|----------------------------------------|--------|--------------------------------------------------------|----------------|
| Pb-C                                   | 7, 9b  | $y = 768e^{\left(-\frac{x}{0.3907}\right)} - 0.7873$   | 0.945          |
| Pb-O<br>(carbon-bound<br>lead oxide)   | 7      | $y = 8267e^{\left(-\frac{x}{0.2498}\right)} + 0.0079$  | 0.963          |
| C-C<br>(carbon-bound<br>lead oxide)    | 7      | $y = 9271e^{\left(-\frac{x}{0.1888}\right)} + 0.7497$  | 0.955          |
| C-O<br>(carbon-bound<br>lead oxide)    | 7      | $y = 26647e^{\left(-\frac{x}{0.1575}\right)} + 0.4292$ | 0.996          |
| Cu-C                                   | 9      | $y = 693e^{\left(-\frac{x}{0.1957}\right)} - 0.9271$   | 0.853          |
| Cu-O<br>(carbon-bound<br>copper oxide) | 9a     | $y = 400e^{\left(-\frac{x}{0.4129}\right)} - 2.380$    | 0.967          |

|                                        |    |                                             |       |
|----------------------------------------|----|---------------------------------------------|-------|
| C-C<br>(carbon-bound<br>copper oxide ) | 9a | $y = 29981e^{(-\frac{x}{0.1612})} + 0.5073$ | 0.933 |
| C-O<br>(carbon-bound<br>copper oxide ) | 9a | $y = 7532e^{(-\frac{x}{0.1957})} - 3.077$   | 0.912 |

### S6: Energy rankings for sequential carbon attachment to Cu<sub>5</sub>O<sub>5</sub>

Energy rankings for sequential carbon additions (3-12 atoms) to Cu<sub>5</sub>O<sub>5</sub>, shown up to 500 kJ mol<sup>-1</sup> above lowest energy structure.

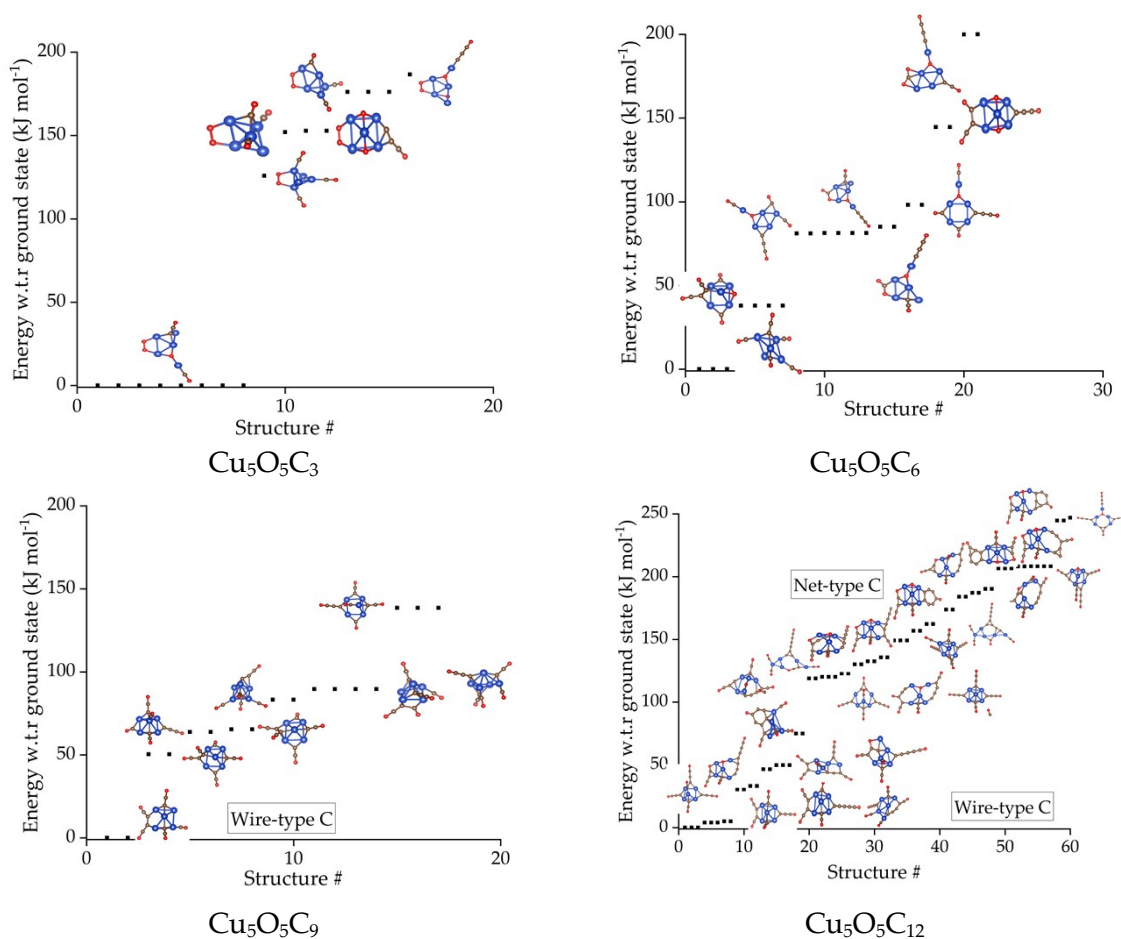

**Figure S5.** Possible structures for carbon addition to Cu<sub>5</sub>O<sub>5</sub> generated by *ab initio* random structure searching.

### S7: Radial distribution function for Cu...Cu distances from carbon binding study to $\text{Cu}_5\text{O}_5$

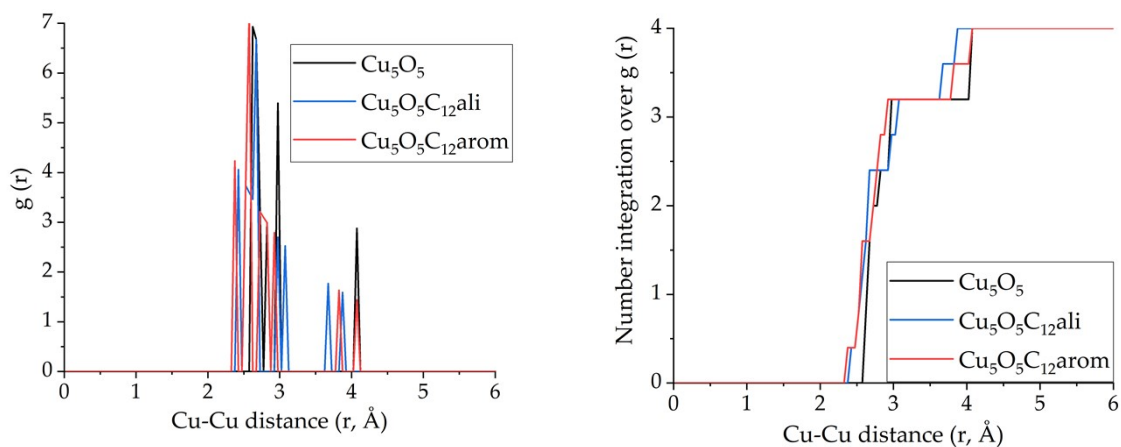

**Figure S6.** Radial distribution function  $g(r)$  (left) and integration over  $g(r)$  (right) for Cu...Cu distances within  $\text{Cu}_5\text{O}_5$ , and aliphatic-C and aromatic-C bound clusters.

### S8: Small molecule binding study to metal oxide clusters: $\text{NO}_2$ and $\text{CH}_2\text{O}$ bond weakening effects

Looking next to the activation of N–O and C–O through bond weakening, graphs of local force constants vs bond length are reported in Figure S7, with the trend line obtained from Christopher et al<sup>5</sup> (black line) which originates from the N–O and C–O bond strengths from a larger data set of energetic molecules. The strength of the C–O and N–O bonds in  $\text{CH}_2\text{O}$  and  $\text{NO}_2$  are strong (black square), at ca. 12 and 9 mDyn  $\text{Å}^{-1}$  respectively.

For lead oxide clusters, binding of the small molecules to any cluster results in significant bond weakening, to ca. 4 mDyn  $\text{Å}^{-1}$ ; ~ 60 % reduction in the strength of the bonds. Thus it can be concluded that all species are acting as Lewis acids, and catalytically activate both N–O and C–O bonds.

For copper oxide clusters, the effect for  $\text{CH}_2\text{O}$  binding is similar in the presence of carbon (where binding largely occurs through carbon atoms), whilst binding to copper oxide clusters results in less bond weakening, ca. 50 %. For  $\text{NO}_2$  binding, the bond weakening effect is also less pronounced for bare copper oxide. The introduction of carbon provides carbon sites for  $\text{NO}_2$  binding, acting as Lewis acids.

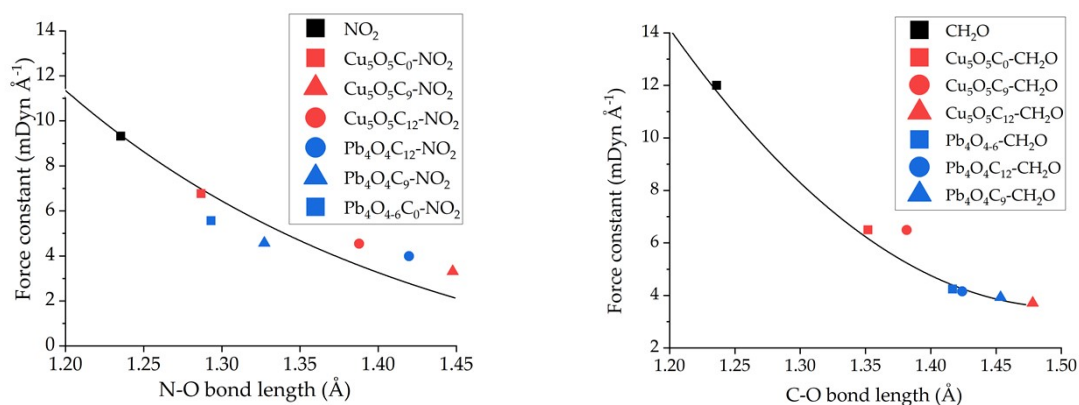

**Figure S7.** N-O (left) and C-O (right) bond weakening from NO<sub>2</sub> and CH<sub>2</sub>O binding to lead and copper oxide clusters with varying carbon content for Pb<sub>4</sub>O<sub>4</sub> and Cu<sub>5</sub>O<sub>5</sub>. Trend line from ref 5.

### S9: Individual binding modes for NO<sub>2</sub> and CH<sub>2</sub>O to Pb<sub>4</sub>O<sub>4-6</sub>C<sub>0-12</sub> and Cu<sub>5</sub>O<sub>5</sub>C<sub>0-12</sub> clusters

**Table S2.** NO<sub>2</sub> binding to Pb<sub>4</sub>O<sub>4-6</sub> and Pb<sub>4</sub>O<sub>4</sub>C<sub>9,12</sub>

| System<br>[Spin]                                                          | Binding energy<br>(kJ mol <sup>-1</sup> ) | Optimised<br>geometry | Binding energy<br>(kJ mol <sup>-1</sup> ) | Optimised<br>geometry |
|---------------------------------------------------------------------------|-------------------------------------------|-----------------------|-------------------------------------------|-----------------------|
| Pb <sub>4</sub> O <sub>4</sub> C <sub>12</sub><br>(aromatic)<br>[Doublet] | -274*                                     |                       | -168                                      |                       |
|                                                                           | -267                                      |                       | -151                                      |                       |
|                                                                           | -249                                      |                       | -140                                      |                       |
|                                                                           | -232*                                     |                       | -85*                                      |                       |

|                                                                           |       |                                                                                     |      |                                                                                       |
|---------------------------------------------------------------------------|-------|-------------------------------------------------------------------------------------|------|---------------------------------------------------------------------------------------|
| Pb <sub>4</sub> O <sub>4</sub> C <sub>9</sub><br>(aliphatic)<br>[Doublet] | -132* | 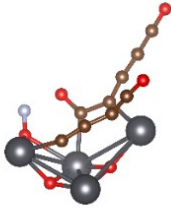   | -113 |    |
|                                                                           | -129  |    | -79  |    |
|                                                                           | -129  |    | 16   |    |
| Pb <sub>4</sub> O <sub>4</sub><br>[Doublet]                               | 1     |   | 30   |   |
|                                                                           | 13    |  |      |                                                                                       |
| Pb <sub>4</sub> O <sub>5</sub><br>[Doublet]                               | -48   |  | 14   |  |
|                                                                           | -39   |  |      |                                                                                       |
| Pb <sub>4</sub> O <sub>6</sub><br>[Doublet]                               | -80   |  | -2   |  |
|                                                                           | -35   |  | 15   |  |

\*Binding mode breaks N–O bond.



**Table S3.** CH<sub>2</sub>O binding to Pb<sub>4</sub>O<sub>4-6</sub> and Pb<sub>4</sub>O<sub>4</sub>C<sub>9,12</sub>.

| System<br>[Spin]                                                          | Binding energy<br>(kJ mol <sup>-1</sup> ) | Optimised<br>geometry                                                               | Binding<br>energy<br>(kJ mol <sup>-1</sup> ) | Optimised<br>geometry                                                                 |
|---------------------------------------------------------------------------|-------------------------------------------|-------------------------------------------------------------------------------------|----------------------------------------------|---------------------------------------------------------------------------------------|
| Pb <sub>4</sub> O <sub>4</sub> C <sub>12</sub><br>(aromatic)<br>[Singlet] | -232                                      |    | -61                                          |    |
|                                                                           | -158                                      |    | -39                                          |    |
|                                                                           | -74                                       |   | -36                                          |   |
| Pb <sub>4</sub> O <sub>4</sub> C <sub>9</sub><br>(aliphatic)<br>[Singlet] | -154                                      |  | -58                                          |  |
|                                                                           | -116                                      |  | -1                                           |  |
|                                                                           | -101                                      |  | 8                                            |  |

|                         |     |                                                                                     |                                                                                       |
|-------------------------|-----|-------------------------------------------------------------------------------------|---------------------------------------------------------------------------------------|
| $\text{Pb}_4\text{O}_4$ | -63 |                                                                                     | 13                                                                                    |
| [Singlet]               |     |    |    |
|                         | -62 |    |                                                                                       |
| $\text{Pb}_4\text{O}_5$ | -59 |                                                                                     | 2.5                                                                                   |
| [Singlet]               |     |    |    |
|                         | -45 |    | 11                                                                                    |
|                         |     |                                                                                     |    |
| $\text{Pb}_4\text{O}_6$ | -68 |                                                                                     | 9                                                                                     |
| [Singlet]               |     |  |  |
|                         | -34 |  |                                                                                       |

**Table S4.** NO<sub>2</sub> binding to Cu<sub>5</sub>O<sub>5</sub> and Cu<sub>5</sub>O<sub>5</sub>C<sub>9,12</sub>.

| System<br>[Spin]                                                           | Binding energy<br>(kJ mol <sup>-1</sup> ) | Optimised<br>geometry                                                               | Binding energy<br>(kJ mol <sup>-1</sup> ) | Optimised<br>geometry                                                                 |
|----------------------------------------------------------------------------|-------------------------------------------|-------------------------------------------------------------------------------------|-------------------------------------------|---------------------------------------------------------------------------------------|
| Cu <sub>5</sub> O <sub>5</sub> C <sub>12</sub><br>(aliphatic)<br>[Triplet] | -137                                      | 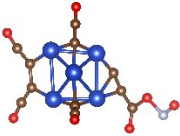   | -70                                       |    |
|                                                                            | -132                                      |    | -9                                        |    |
|                                                                            | -130*                                     |    | 2                                         |    |
|                                                                            | -86                                       |   |                                           |                                                                                       |
| Cu <sub>5</sub> O <sub>5</sub> C <sub>9</sub><br>(aliphatic)<br>[Singlet]  | -133                                      |  | -32                                       |  |
|                                                                            | -50                                       |  | 3                                         |  |
| Cu <sub>5</sub> O <sub>5</sub><br>[Triplet]                                | -139                                      |  | -40                                       |  |
|                                                                            | -83                                       |  | 9                                         |  |
|                                                                            | -52                                       |  | 22                                        |  |

\*Binding mode breaks N–O bond.

**Table S5.** CH<sub>2</sub>O binding to Cu<sub>5</sub>O<sub>5</sub> and Cu<sub>5</sub>O<sub>5</sub>C<sub>9,12</sub>.

| System<br>[Spin]                                                           | Binding energy<br>(kJ mol <sup>-1</sup> ) | Optimised<br>geometry                                                               | Binding energy<br>(kJ mol <sup>-1</sup> ) | Optimised<br>geometry                                                                 |
|----------------------------------------------------------------------------|-------------------------------------------|-------------------------------------------------------------------------------------|-------------------------------------------|---------------------------------------------------------------------------------------|
| Cu <sub>5</sub> O <sub>5</sub> C <sub>12</sub><br>(aliphatic)<br>[Quartet] | -64                                       | 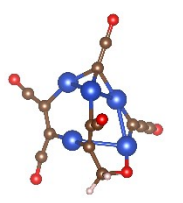   | -16                                       |    |
|                                                                            | -32                                       |    | 24                                        |    |
|                                                                            | -30                                       |    | 41                                        |    |
| Cu <sub>5</sub> O <sub>5</sub> C <sub>9</sub><br>(aliphatic)<br>[Doublet]  | -142                                      |   | -35                                       |   |
|                                                                            | -74                                       |  | 4                                         |  |
|                                                                            | -55                                       |  | 97                                        |  |

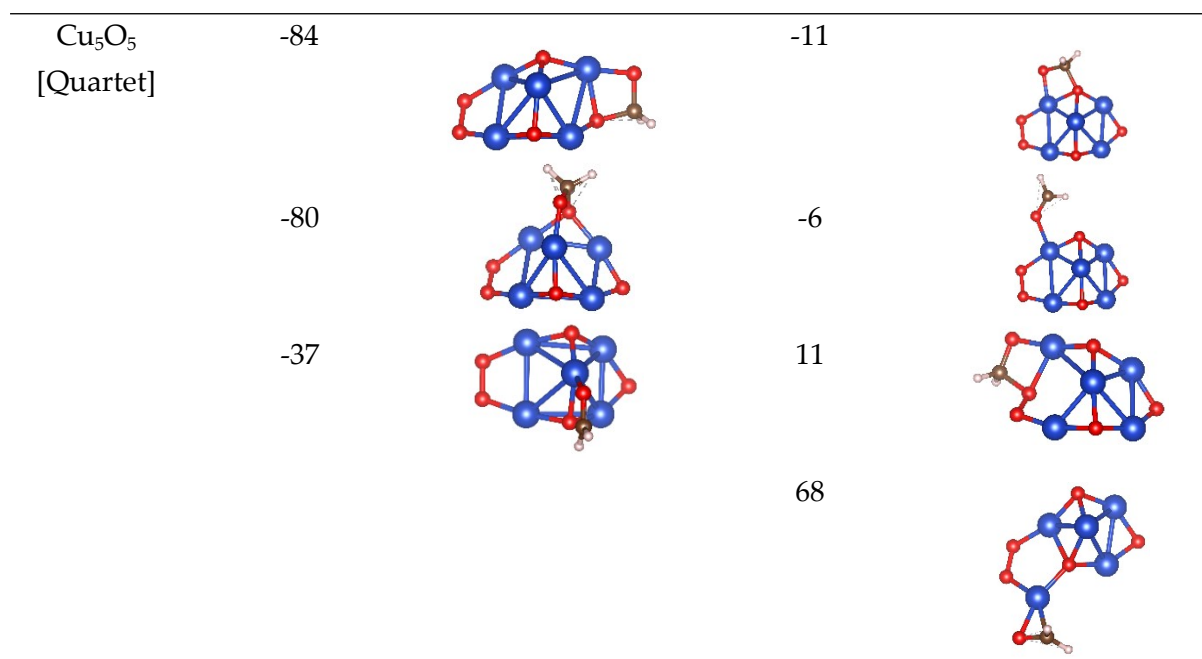

**S10: Exploring the effects of varying electronic spin states for cluster series  $\text{Pb}_4\text{O}_{4-6}\text{C}_{3,12}$  and  $\text{Cu}_5\text{O}_5\text{C}_{3,12}$**

**Table S6.** Energies for the lowest energy structure vs. spin state for sequential addition of carbon to  $\text{Pb}_4\text{O}_{4-6}$  and  $\text{Cu}_5\text{O}_5$ . Energy differences compared to the most stable spin states are given in  $\text{kJ mol}^{-1}$ . Most stable spin states are highlighted in bold.

| System                          |                                            |                |         |         |         |         |         |
|---------------------------------|--------------------------------------------|----------------|---------|---------|---------|---------|---------|
| $\text{Pb}_4\text{O}_4\text{C}$ | Spin                                       | <b>1</b>       | 3       | 5       | 7       | 9       | 11      |
| 3                               | Energy (A.U.)                              | <b>-428.66</b> | -428.62 | -428.58 | -428.50 | -428.40 | -428.31 |
|                                 | Energy difference ( $\text{kJ mol}^{-1}$ ) | <b>0</b>       | +90     | +199    | +419    | +660    | +899    |
| $\text{Pb}_4\text{O}_4\text{C}$ | Spin                                       | <b>1</b>       | 3       | 5       | 7       | 9       | 11      |
| 6                               | Energy (A.U.)                              | <b>-542.75</b> | -542.67 | -542.60 | -542.51 | -542.42 | -542.30 |
|                                 | Energy difference ( $\text{kJ mol}^{-1}$ ) | <b>0</b>       | +203    | +389    | +626    | +850    | +1184   |

|                                               |                                           |                |                |         |         |         |         |
|-----------------------------------------------|-------------------------------------------|----------------|----------------|---------|---------|---------|---------|
| Pb <sub>4</sub> O <sub>4</sub> C <sub>9</sub> | Spin                                      | <b>1</b>       | 3              | 5       | 7       | 9       | 11      |
|                                               | Energy (A.U.)                             | <b>-656.78</b> | -656.77        | -656.69 | -656.62 | -656.52 | -656.40 |
|                                               | Energy difference (kJ mol <sup>-1</sup> ) | <b>0</b>       | +23            | +222    | +407    | +687    | +1000   |
| Pb <sub>4</sub> O <sub>4</sub> C <sub>1</sub> | Spin                                      | <b>1</b>       | 3              | 5       | 7       | 9       | 11      |
|                                               | Energy (A.U.)                             | <b>-770.91</b> | -770.88        | -770.85 | -770.79 | -770.74 | -770.64 |
|                                               | Energy difference (kJ mol <sup>-1</sup> ) | <b>0</b>       | +82            | +166    | +327    | +460    | +734    |
| Pb <sub>4</sub> O <sub>5</sub> C <sub>3</sub> | Spin                                      | <b>1</b>       | 3              | 5       | 7       | 9       | 11      |
|                                               | Energy (A.U.)                             | <b>-503.84</b> | -503.75        | -503.64 | -503.56 | -503.45 | -503.34 |
|                                               | Energy difference (kJ mol <sup>-1</sup> ) | <b>0</b>       | +230           | +518    | +737    | +1002   | +1308   |
| Pb <sub>4</sub> O <sub>5</sub> C <sub>6</sub> | Spin                                      | <b>1</b>       | 3              | 5       | 7       | 9       | 11      |
|                                               | Energy (A.U.)                             | <b>-617.91</b> | -617.86        | -617.76 | -617.68 | -617.60 | -617.51 |
|                                               | Energy difference (kJ mol <sup>-1</sup> ) | <b>0</b>       | +137           | +394    | +603    | +822    | +1043   |
| Pb <sub>4</sub> O <sub>5</sub> C <sub>9</sub> | Spin                                      | <b>1</b>       | 3              | 5       | 7       | 9       | 11      |
|                                               | Energy (A.U.)                             | <b>-731.95</b> | -731.89        | -731.83 | -731.74 | -731.62 | -731.55 |
|                                               | Energy difference (kJ mol <sup>-1</sup> ) | <b>0</b>       | +171           | +310    | +541    | +864    | +1049   |
| Pb <sub>4</sub> O <sub>5</sub> C <sub>1</sub> | Spin                                      | <b>1</b>       | 3              | 5       | 7       | 9       | 11      |
|                                               | Energy (A.U.)                             | -846.09        | <b>-846.11</b> | -846.05 | -845.98 | -845.92 | -845.83 |
|                                               | Energy difference (kJ mol <sup>-1</sup> ) | +48            | <b>0</b>       | +160    | +326    | +484    | +723    |



|                                               |                                           |                 |          |          |          |          |         |
|-----------------------------------------------|-------------------------------------------|-----------------|----------|----------|----------|----------|---------|
| Pb <sub>4</sub> O <sub>6</sub> C <sub>3</sub> | Spin                                      | <b>1</b>        | 3        | 5        | 7        | 9        | 11      |
|                                               | Energy (A.U.)                             | <b>-579.04</b>  | -578.95  | -578.88  | -578.77  | -578.66  | -578.52 |
|                                               | Energy difference (kJ mol <sup>-1</sup> ) | <b>0</b>        | +251     | +438     | +732     | +1000    | +1383   |
| Pb <sub>4</sub> O <sub>6</sub> C <sub>6</sub> | Spin                                      | <b>1</b>        | 3        | 5        | 7        | 9        | 11      |
|                                               | Energy (A.U.)                             | <b>-693.07</b>  | -693.05  | -692.94  | -692.86  | -692.76  | -692.67 |
|                                               | Energy difference (kJ mol <sup>-1</sup> ) | <b>0</b>        | +71      | +337     | +563     | +818     | +1052   |
| Pb <sub>4</sub> O <sub>6</sub> C <sub>9</sub> | Spin                                      | <b>1</b>        | 3        | 5        | 7        | 9        | 11      |
|                                               | Energy (A.U.)                             | <b>-807.18</b>  | -807.15  | -807.09  | -807.03  | -806.94  | -806.84 |
|                                               | Energy difference (kJ mol <sup>-1</sup> ) | <b>0</b>        | +71      | +232     | +393     | +626     | +874    |
| Pb <sub>4</sub> O <sub>6</sub> C <sub>1</sub> | Spin                                      | <b>1</b>        | 3        | 5        | 7        | 9        | 11      |
|                                               | Energy (A.U.)                             | <b>-921.33</b>  | -921.31  | -921.25  | -921.15  | -921.07  | -920.95 |
|                                               | Energy difference (kJ mol <sup>-1</sup> ) | <b>0</b>        | +39      | +212     | +451     | +671     | +997    |
| Cu <sub>5</sub> O <sub>5</sub> C <sub>3</sub> | Spin                                      | <b>2</b>        | 4        | 6        | 8        | 10       |         |
|                                               | Energy (A.U.)                             | <b>-1476.34</b> | -1476.30 | -1476.20 | -1476.09 | -1476.01 |         |
|                                               | Energy difference (kJ mol <sup>-1</sup> ) | <b>0</b>        | +107     | +368     | +652     | +864     |         |
| Cu <sub>5</sub> O <sub>5</sub> C <sub>6</sub> | Spin                                      | <b>2</b>        | 4        | 6        | 8        | 10       |         |
|                                               | Energy (A.U.)                             | <b>-1590.50</b> | -1590.47 | -1590.41 | -1590.30 | -1590.14 |         |
|                                               | Energy difference (kJ mol <sup>-1</sup> ) | <b>0</b>        | +94      | +246     | +532     | +961     |         |

|                                               |                                           |                 |                 |          |          |          |
|-----------------------------------------------|-------------------------------------------|-----------------|-----------------|----------|----------|----------|
| Cu <sub>5</sub> O <sub>5</sub> C <sub>9</sub> | Spin                                      | <b>2</b>        | 4               | 6        | 8        | 10       |
|                                               | Energy (A.U.)                             | <b>-1704.60</b> | -1704.57        | -1704.48 | -1704.38 | -1704.28 |
|                                               | Energy difference (kJ mol <sup>-1</sup> ) | <b>0</b>        | +72             | +327     | +580     | +802     |
| Cu <sub>5</sub> O <sub>5</sub> C <sub>1</sub> | Spin                                      | 2               | <b>4</b>        | 6        | 8        | 10       |
|                                               | Energy (A.U.)                             | -1818.62        | <b>-1818.62</b> | -1818.56 | -1818.46 | -1818.38 |
|                                               | Energy difference (kJ mol <sup>-1</sup> ) | +2              | <b>0</b>        | +150     | +405     | +621     |

**Table S7.** Energies for the structures Pb<sub>4</sub>O<sub>4-6</sub>C<sub>12</sub> and Cu<sub>5</sub>O<sub>5</sub>C<sub>12</sub> found within 250 kJ mol<sup>-1</sup> of the lowest energy structure. Energies shown for the singlet/triplet spin state for lead-based systems and doublet/quartet for copper-based. The most stable spin is highlighted in bold, and the energy difference given in brackets.

| System                                         | Structure | Energy (A.U.)                         |                                         | Energy difference from structure 1 (kJ mol <sup>-1</sup> ) |                                                                                       |
|------------------------------------------------|-----------|---------------------------------------|-----------------------------------------|------------------------------------------------------------|---------------------------------------------------------------------------------------|
|                                                |           | Spin 1                                | Spin 3                                  |                                                            |                                                                                       |
| Pb <sub>4</sub> O <sub>4</sub> C <sub>12</sub> | 1         | <b>-770.91</b>                        | -770.88<br>(+82 kJ mol)                 | 0                                                          | 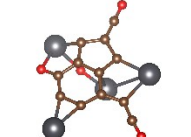 |
|                                                | 2         | -770.88<br>(+6 kJ mol <sup>-1</sup> ) | <b>-770.88</b>                          | +82                                                        |  |
|                                                | 3         | <b>-770.87</b>                        | -770.84<br>(+78 kJ mol <sup>-1</sup> )  | +121                                                       |  |
|                                                | 4         | <b>-770.86</b>                        | -770.80<br>(+154 kJ mol <sup>-1</sup> ) | +142                                                       |  |
|                                                | 5         | <b>-770.85</b>                        | -770.84<br>(+32 kJ mol <sup>-1</sup> )  | +172                                                       |  |

|                                                |    |                                         |                                         |      |                                                                                       |
|------------------------------------------------|----|-----------------------------------------|-----------------------------------------|------|---------------------------------------------------------------------------------------|
|                                                | 6  | <b>-770.84</b>                          | -770.81<br>(+87 kJ mol <sup>-1</sup> )  | +195 | 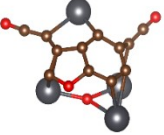   |
|                                                | 7  | <b>-770.84</b>                          | -770.83<br>(+25 kJ mol <sup>-1</sup> )  | +199 |    |
|                                                | 8  | <b>-770.84</b>                          | -770.83<br>(+15 kJ mol <sup>-1</sup> )  | +204 |    |
|                                                | 9  | <b>-770.83</b>                          | -770.81<br>(+65 kJ mol <sup>-1</sup> )  | +218 |    |
|                                                | 10 | <b>-770.83</b>                          | -770.78<br>(+117 kJ mol <sup>-1</sup> ) | +230 |   |
|                                                | 11 | <b>-770.83</b>                          | -770.82<br>(+21 kJ mol <sup>-1</sup> )  | +233 |  |
| <hr/>                                          |    |                                         |                                         |      |                                                                                       |
| Pb <sub>4</sub> O <sub>5</sub> C <sub>12</sub> | 1  | -846.09<br>(+48 kJ mol <sup>-1</sup> )  | <b>-846.11</b>                          | 0    |  |
|                                                | 2  | <b>-846.09</b>                          | -846.09<br>(+6 kJ mol <sup>-1</sup> )   | +51  |  |
|                                                | 3  | -846.00<br>(+151 kJ mol <sup>-1</sup> ) | <b>-846.06</b>                          | +130 |  |

|                                                |   |                                        |                                         |      |                                                                                       |
|------------------------------------------------|---|----------------------------------------|-----------------------------------------|------|---------------------------------------------------------------------------------------|
|                                                | 4 | -846.03<br>(+20 kJ mol <sup>-1</sup> ) | <b>-846.04</b>                          | +180 | 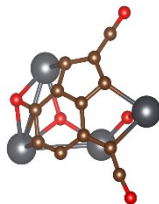   |
|                                                | 5 | <b>-846.04</b>                         | -846.02<br>(+35 kJ mol <sup>-1</sup> )  | +182 |    |
|                                                | 6 | <b>-846.03</b>                         | -846.01<br>(+46 kJ mol <sup>-1</sup> )  | +214 |    |
|                                                | 7 | <b>-846.02</b>                         | -846.00<br>(+57 kJ mol <sup>-1</sup> )  | +216 |   |
|                                                | 8 | <b>-846.02</b>                         | -846.00<br>(+51 kJ mol <sup>-1</sup> )  | +218 |  |
|                                                | 9 | -845.99<br>(+72 kJ mol <sup>-1</sup> ) | <b>-846.02</b>                          | +236 |  |
| <hr/>                                          |   |                                        |                                         |      |                                                                                       |
| Pb <sub>4</sub> O <sub>6</sub> C <sub>12</sub> | 1 | <b>-921.33</b>                         | -921.26<br>(+193 kJ mol <sup>-1</sup> ) | 0    |  |
|                                                | 2 | <b>-921.33</b>                         | -921.31<br>(+39 kJ mol <sup>-1</sup> )  | +7   |  |
|                                                | 3 | -921.29<br>(+59 kJ mol <sup>-1</sup> ) | <b>-921.31</b>                          | +43  |  |

|   |                |                                         |      |                                                                                       |
|---|----------------|-----------------------------------------|------|---------------------------------------------------------------------------------------|
| 4 | <b>-921.28</b> | -921.27<br>(+36 kJ mol <sup>-1</sup> )  | +119 | 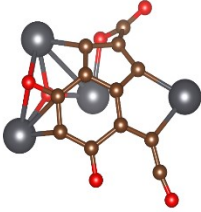   |
| 5 | <b>-921.27</b> | -921.24<br>(+86 kJ mol <sup>-1</sup> )  | +158 |    |
| 6 | <b>-921.25</b> | -921.21<br>(+102 kJ mol <sup>-1</sup> ) | +208 |    |
| 7 | <b>-921.24</b> | -921.22<br>(+53 kJ mol <sup>-1</sup> )  | +231 |   |
| 8 | <b>-921.24</b> | -921.22<br>(+39 kJ mol <sup>-1</sup> )  | +236 |  |
| 9 | <b>-921.23</b> | -921.22<br>(+51 kJ mol <sup>-1</sup> )  | +247 |  |

| System                                         | Structure | Energy (A.U.)                          |                                        | Energy difference from structure 1<br>(kJ mol <sup>-1</sup> ) | 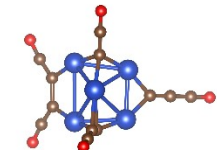 |
|------------------------------------------------|-----------|----------------------------------------|----------------------------------------|---------------------------------------------------------------|---------------------------------------------------------------------------------------|
|                                                |           | Spin 2                                 | Spin 4                                 |                                                               |                                                                                       |
| Cu <sub>5</sub> O <sub>5</sub> C <sub>12</sub> | 1         | -1818.62<br>(+2 kJ mol <sup>-1</sup> ) | <b>-1818.62</b>                        | 0                                                             |                                                                                       |
|                                                | 2         | <b>-1818.62</b>                        | -1818.62<br>(+4 kJ mol <sup>-1</sup> ) | +2                                                            |  |

|    |                                         |                                         |      |                                                                                       |
|----|-----------------------------------------|-----------------------------------------|------|---------------------------------------------------------------------------------------|
| 3  | -1818.60<br>(+38 kJ mol <sup>-1</sup> ) | <b>-1818.62</b>                         | +5   | 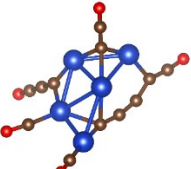   |
| 4  | <b>-1818.61</b>                         | -1818.60<br>(+4 kJ mol <sup>-1</sup> )  | +30  |    |
| 5  | <b>-1818.61</b>                         | -1818.58<br>(+56 kJ mol <sup>-1</sup> ) | +33  |    |
| 6  | <b>-1818.60</b>                         | -1818.59<br>(+16 kJ mol <sup>-1</sup> ) | +47  |    |
| 7  | <b>-1818.60</b>                         | -1818.59<br>(+33 kJ mol <sup>-1</sup> ) | +50  |   |
| 8  | <b>-1818.59</b>                         | -1818.58<br>(+33 kJ mol <sup>-1</sup> ) | +75  |  |
| 9  | <b>-1818.57</b>                         | -1818.57<br>(+1 kJ mol <sup>-1</sup> )  | +119 |  |
| 10 | -1818.54<br>(+94 kJ mol <sup>-1</sup> ) | <b>-1818.57</b>                         | +120 |  |
| 11 | <b>-1818.57</b>                         | -1818.55<br>(+45 kJ mol <sup>-1</sup> ) | +122 |  |



|    |                                         |                                         |      |                                                                                       |
|----|-----------------------------------------|-----------------------------------------|------|---------------------------------------------------------------------------------------|
| 12 | -1818.55<br>(+37 kJ mol <sup>-1</sup> ) | <b>-1818.57</b>                         | +130 | 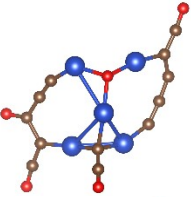   |
| 13 | <b>-1818.57</b>                         | -1818.55<br>(+44 kJ mol <sup>-1</sup> ) | +133 |    |
| 14 | -1818.55<br>(+34 kJ mol <sup>-1</sup> ) | <b>-1818.57</b>                         | +136 |    |
| 15 | <b>-1818.56</b>                         | -1818.54<br>(+67 kJ mol <sup>-1</sup> ) | +149 |    |
| 16 | <b>-1818.56</b>                         | -1818.55<br>(+29 kJ mol <sup>-1</sup> ) | +157 |   |
| 17 | <b>-1818.56</b>                         | -1818.53<br>(+70 kJ mol <sup>-1</sup> ) | +162 |  |
| 18 | <b>-1818.55</b>                         | -1818.53<br>(+66 kJ mol <sup>-1</sup> ) | +174 |  |
| 19 | <b>-1818.55</b>                         | -1818.54<br>(+31 kJ mol <sup>-1</sup> ) | +184 |  |
| 20 | -1818.55<br>(+1 kJ mol <sup>-1</sup> )  | <b>-1818.55</b>                         | +187 |  |
| 21 | -1818.54<br>(+12 kJ mol <sup>-1</sup> ) | -1818.55                                | +190 |  |

|    |                                         |                                         |      |                                                                                      |
|----|-----------------------------------------|-----------------------------------------|------|--------------------------------------------------------------------------------------|
| 22 | <b>-1818.54</b>                         | -1818.52<br>(+63 kJ mol <sup>-1</sup> ) | +207 | 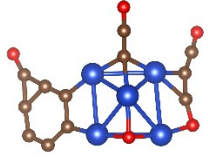  |
| 23 | <b>-1818.54</b>                         | -1818.52<br>(+50 kJ mol <sup>-1</sup> ) | +208 |   |
| 24 | -1818.54<br>(+7 kJ mol <sup>-1</sup> )  | <b>-1818.54</b>                         | +209 |   |
| 25 | <b>-1818.52</b>                         | -1818.5<br>(+63 kJ mol <sup>-1</sup> )  | +245 |   |
| 26 | -1818.51<br>(+49 kJ mol <sup>-1</sup> ) | <b>-1818.52</b>                         | +247 |  |

---

## References

- 1 J. S. Ogden and M. J. Ricks, *J. Chem. Phys.*, 1972, **56**, 1658.
- 2 A. Popovič, A. Lesar, M. Guček and L. Bencze, *Rapid Commun. Mass Spectrom.*, 1997, **11**, 459–468.
- 3 G. V Chertihin and L. Andrews, *J. Chem. Phys.*, 1996, **105**, 2561.
- 4 J. Drowart, R. Colin and G. Exsteen, *Trans. Faraday Soc.*, 1965, **61**, 1376–1383.
- 5 I. L. Christopher, A. A. L. Michalchuk, C. R. Pulham and C. A. Morrison, *Front. Chem.*, 2021, **9**, 1–13.
